# Supplementary material for: Tearable and Fillable Composite Sponges Capable of Heat Generation and Drug Release in Response to Alternating Magnetic Field
Source: PubMed Central journal article supplement (PMC7475967; doi:10.3390/ma13163637), 2020-08-17
Supplement: materials-13-03637-s001.pdf [file materials-13-03637-s001.pdf]

**Supplementary Materials**

Table S1. Synthesis conditions of MNPs.

| Sample | Fe(acac) <sub>3</sub> concentration (mM) | Additive Amount of Hydrazine Monohydrate (equiv.) | Additive Amount of Distilled Water (equiv.) |
|--------|------------------------------------------|---------------------------------------------------|---------------------------------------------|
| MNPs-1 | 0.5                                      | 6                                                 | 72                                          |
| MNPs-2 | 0.7                                      | 6                                                 | 72                                          |
| MNPs-3 | 0.9                                      | 4                                                 | 72                                          |
| MNPs-4 | 0.9                                      | 6                                                 | 36                                          |
| MNPs-5 | 0.9                                      | 6                                                 | 72                                          |
| MNPs-6 | 0.9                                      | 6                                                 | 108                                         |
| MNPs-7 | 0.9                                      | 8                                                 | 72                                          |
| MNPs-8 | 0.9                                      | 8                                                 | 144                                         |
| MNPs-9 | 1.1                                      | 6                                                 | 72                                          |

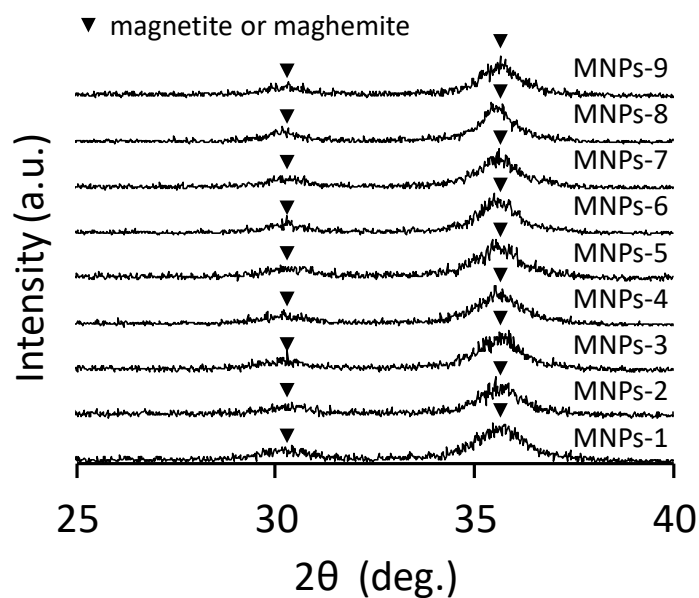
**Figure S1.** XRD patterns of MNPs.

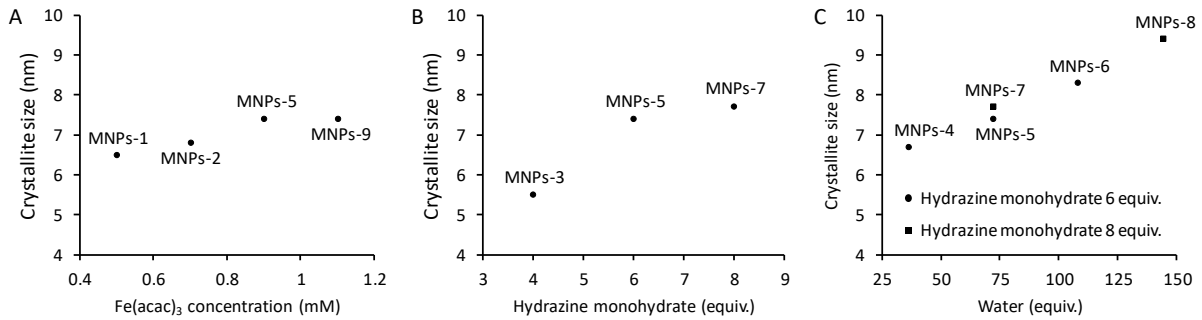

**Figure S2.** Relationship between crystallite size and  $\text{Fe}(\text{acac})_3$  concentration (A), the molar equivalent of hydrazine monohydrate to  $\text{Fe}(\text{acac})_3$  (B), or the molar equivalent of water to  $\text{Fe}(\text{acac})_3$  (C).

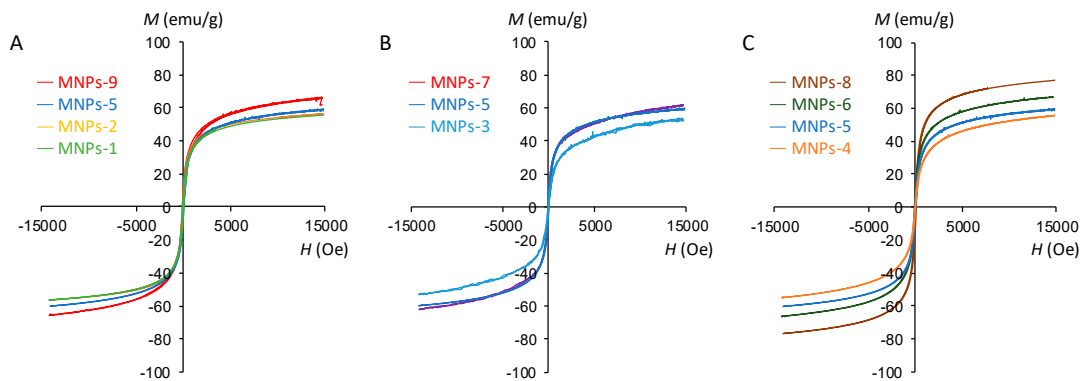

**Figure S3.** Magnetization curves of MNPs at room temperature. The influences of  $\text{Fe}(\text{acac})_3$  concentration (A), additive amounts of hydrazine monohydrate (B), and water (C) on magnetic properties.

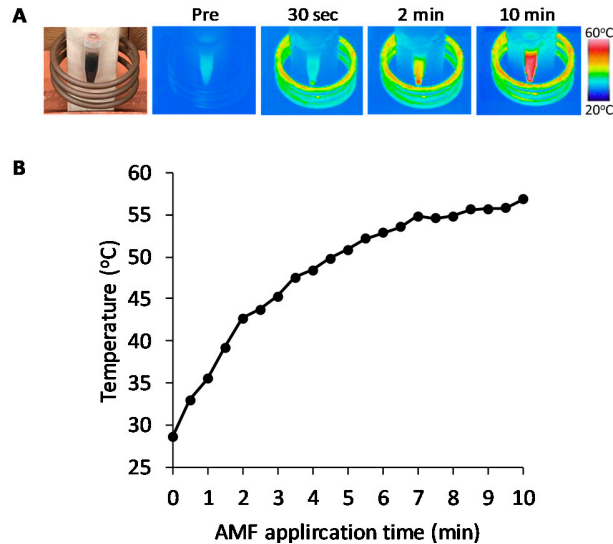

**Figure S4.** (A) Photograph and thermal images of MNPs-8 dispersed in distilled water before and during AMF application. (B) Temperature change of MNPs-8-dispersed water following AMF application.

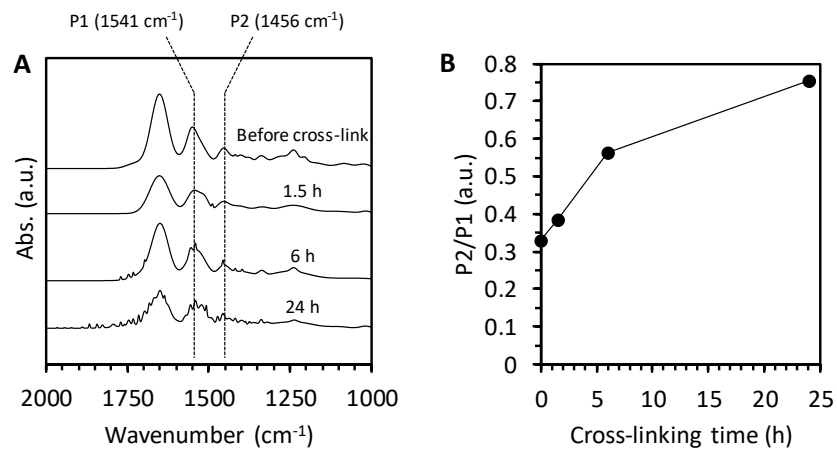

**Figure S5.** (A) FTIR spectra of MDC sponges before and after crosslinking for 1.5, 6, and 24 h. (B) Effects of crosslinking time on the area ratio of P2 to P1, which indicates crosslinking density.
